# Supplementary material for: Soil aggregates indirectly influence litter carbon storage and release through soil pH in the highly alkaline soils of north China
Source: PeerJ. 2019 Oct 29;7:e7949. doi: 10.7717/peerj.7949 (PMC6824446; doi:10.7717/peerj.7949)
Supplement: Supplemental Information 1 [file peerj-07-7949-s001.xlsx]

## Sheet: Sheet1
	CO2 release rate (ug C g aggregate-1 day-1)
	CK
Days	2-4mm	2-4mm	2-4mm	1-2mm	1-2mm	1-2mm	0.25-1mm	0.25-1mm	0.25-1mm	<0.25mm	<0.25mm	<0.25mm
1	265.1	261.8	266.75	305.25	361.35	401.5	189.2	190.3	176.55	209.2	210.3	196.55
7	187	174.9	151.8	213.95	221.1	198	103.95	115.5	88	123.95	135.5	108
14	119.35	123.75	107.25	139.7	151.25	142.45	74.25	85.25	75.35	94.25	105.25	95.35
28	91.85	96.25	79.75	112.2	123.75	114.95	46.75	57.75	47.85	66.75	77.75	67.85
42	75.35	79.75	63.25	95.7	107.25	98.45	30.25	41.25	31.35	50.25	61.25	51.35
56	64.35	68.75	52.25	84.7	96.25	87.45	19.25	30.25	20.35	39.25	50.25	40.35
	Leaf
Days	2-4mm	2-4mm	2-4mm	1-2mm	1-2mm	1-2mm	0.25-1mm	0.25-1mm	0.25-1mm	<0.25mm	<0.25mm	<0.25mm
1	929.5	924	943.25	962.5	961.95	957.55	778.8	784.85	801.9	808.8	814.85	831.9
7	958.65	961.4	949.3	1023.55	1025.75	1023	891	893.75	888.8	921	923.75	918.8
14	518.65	521.4	509.3	583.55	585.75	583	451	453.75	448.8	481	483.75	478.8
28	353.65	356.4	344.3	418.55	420.75	418	286	288.75	283.8	316	318.75	313.8
42	271.15	273.9	261.8	336.05	338.25	335.5	203.5	206.25	201.3	233.5	236.25	231.3
56	216.15	218.9	206.8	281.05	283.25	280.5	148.5	151.25	146.3	178.5	181.25	176.3
	Stem
Days	2-4mm	2-4mm	2-4mm	1-2mm	1-2mm	1-2mm	0.25-1mm	0.25-1mm	0.25-1mm	<0.25mm	<0.25mm	<0.25mm
1	692.45	741.4	781	860.75	858	883.85	726.55	731.5	716.1	751.55	756.5	741.1
7	904.75	893.75	910.25	959.75	946	943.25	779.9	754.6	767.25	804.9	779.6	792.25
14	464.75	453.75	470.25	519.75	506	503.25	339.9	314.6	327.25	364.9	339.6	352.25
28	299.75	288.75	305.25	354.75	341	338.25	174.9	149.6	162.25	199.9	174.6	187.25
42	217.25	206.25	222.75	272.25	258.5	255.75	92.4	67.1	79.75	117.4	92.1	104.75
56	162.25	151.25	167.75	217.25	203.5	200.75	37.4	12.1	24.75	62.4	37.1	49.75
	All
Days	2-4mm	2-4mm	2-4mm	1-2mm	1-2mm	1-2mm	0.25-1mm	0.25-1mm	0.25-1mm	<0.25mm	<0.25mm	<0.25mm
1	861.3	830.5	838.75	883.3	902	922.35	778.25	770.55	752.4	805.75	798.05	779.9
7	920.15	911.9	928.95	1005.4	979.55	984.5	867.35	842.6	863.5	894.85	870.1	891
14	480.15	471.9	488.95	565.4	539.55	544.5	427.35	402.6	423.5	454.85	430.1	451
28	315.15	306.9	323.95	400.4	374.55	379.5	262.35	237.6	258.5	289.85	265.1	286
42	232.65	224.4	241.45	317.9	292.05	297	179.85	155.1	176	207.35	182.6	203.5
56	177.65	169.4	186.45	262.9	237.05	242	124.85	100.1	121	152.35	127.6	148.5
	SOC(g kg-1)
	CK
Days	2-4mm	2-4mm	2-4mm	1-2mm	1-2mm	1-2mm	0.25-1mm	0.25-1mm	0.25-1mm	<0.25mm	<0.25mm	<0.25mm
28	13.6663	13.6335	13.7543	11.8	11.725	11.7252	7.65128	7.13493	7.39721	16.0468	16.1819	16.0702
56	13.5975	13.6784	13.4908	11.2021	11.4633	11.4912	7.90973	7.92113	7.91772	16.3203	16.4303	16.4629
	Leaf
Days	2-4mm	2-4mm	2-4mm	1-2mm	1-2mm	1-2mm	0.25-1mm	0.25-1mm	0.25-1mm	<0.25mm	<0.25mm	<0.25mm
28	16.3439	15.6601	15.7947	17.8428	14.938	14.0972	9.46495	8.76525	8.20483	16.8536	17.1656	16.8588
56	14.8657	14.4897	14.6055	14.8872	14.5941	14.5069	8.40083	8.76346	8.64971	16.8697	16.5138	17.2212
	Stem
Days	2-4mm	2-4mm	2-4mm	1-2mm	1-2mm	1-2mm	0.25-1mm	0.25-1mm	0.25-1mm	<0.25mm	<0.25mm	<0.25mm
28	13.7152	14.8308	16.0028	13.4544	13.5166	12.9445	8.27463	8.1345	8.31761	16.4212	16.5585	16.8051
56	14.1225	14.2121	14.5243	13.379	13.6313	13.8149	10.0571	8.2128	8.72187	16.709	16.6721	16.5873
	All
Days	2-4mm	2-4mm	2-4mm	1-2mm	1-2mm	1-2mm	0.25-1mm	0.25-1mm	0.25-1mm	<0.25mm	<0.25mm	<0.25mm
28	14.8691	15.048	15.3183	15.24	15.1636	15	8.52924	8.58983	8.40356	17.0959	16.814	17.0473
56	14.0788	14.1389	14.0921	14.3762	14.726	14.5069	9.43247	8.75744	8.92287	16.6938	16.486	16.4965
	Soil pH
	CK
Days	2-4mm	2-4mm	2-4mm	1-2mm	1-2mm	1-2mm	0.25-1mm	0.25-1mm	0.25-1mm	<0.25mm	<0.25mm	<0.25mm
28	8.45	8.45	8.43	8.46	8.48	8.45	8.68	8.7	8.71	8.35	8.37	8.35
56	7.93	7.96	7.91	8	8.03	8.02	8.23	8.26	8.27	8.02	8.03	8
	Leaf
Days	2-4mm	2-4mm	2-4mm	1-2mm	1-2mm	1-2mm	0.25-1mm	0.25-1mm	0.25-1mm	<0.25mm	<0.25mm	<0.25mm
28	8.27	8.27	8.24	8.3	8.33	8.33	8.49	8.46	8.47	8.16	8.14	8.16
56	7.75	7.78	7.77	7.8	7.83	7.83	7.88	7.87	7.87	7.71	7.73	7.74
	Stem
Days	2-4mm	2-4mm	2-4mm	1-2mm	1-2mm	1-2mm	0.25-1mm	0.25-1mm	0.25-1mm	<0.25mm	<0.25mm	<0.25mm
28	8.4	8.39	8.38	8.42	8.39	8.41	8.61	8.64	8.62	8.29	8.3	8.33
56	7.86	7.87	7.88	7.92	7.89	7.91	8.03	8.06	8	7.86	7.85	7.83
	All
Days	2-4mm	2-4mm	2-4mm	1-2mm	1-2mm	1-2mm	0.25-1mm	0.25-1mm	0.25-1mm	<0.25mm	<0.25mm	<0.25mm
28	8.33	8.36	8.35	8.36	8.35	8.37	8.54	8.51	8.52	8.26	8.28	8.25
56	7.82	7.84	7.8	7.86	7.85	7.87	7.9	7.95	7.97	7.75	7.73	7.76

## Sheet: Sheet2
Cs(g kg-1)	Leaf
Days	2-4mm	2-4mm	2-4mm	Mean	SE	1-2mm	1-2mm	1-2mm	Mean	SE	0.25-1mm	0.25-1mm	0.25-1mm	Mean	SE	<0.25mm	<0.25mm	<0.25mm	Mean	SE
28	2.67757	2.02656	2.04038	2.24817	0.214735	6.04282	3.21295	2.37203	3.87593	1.11031	1.81367	1.63032	0.807617	1.4172	0.309354	0.80678	0.9837	0.788603	0.859694	0.0622244
56	1.26819	0.811265	1.11462	1.06469	0.134245	3.68504	3.13084	3.01561	3.27716	0.206633	0.491096	0.842337	0.731992	0.688475	0.103703	0.549375	0.0834572	0.758295	0.463709	0.199462
	Stem
Days	2-4mm	2-4mm	2-4mm			1-2mm	1-2mm	1-2mm			0.25-1mm	0.25-1mm	0.25-1mm			<0.25mm	<0.25mm	<0.25mm
28	1.18371	1.19724	2.24844	1.54313	0.352677	1.65438	1.79159	1.21927	1.55508	0.172513	0.623351	0.999569	0.920402	0.847774	0.114515	0.374409	0.376679	0.734853	0.495313	0.119771
56	0.524966	0.533659	1.03347	0.697365	0.168071	2.1769	2.16802	2.32369	2.22287	0.0504763	2.1474	0.291675	0.804157	1.08108	0.553305	0.38868	0.241761	0.124372	0.251605	0.0764576
	All
Days	2-4mm	2-4mm	2-4mm			1-2mm	1-2mm	1-2mm			0.25-1mm	0.25-1mm	0.25-1mm			<0.25mm	<0.25mm	<0.25mm
28	1.20286	1.4145	1.56402	1.39379	0.10477	3.44004	3.43858	3.27478	3.38447	0.0548447	0.877958	1.4549	1.00635	1.11307	0.174889	1.04909	0.632173	0.977111	0.886126	0.128665
56	0.481292	0.460418	0.601242	0.514317	0.043878	3.17405	3.26267	3.01566	3.15079	0.0722489	1.52274	0.836312	1.00515	1.1214	0.206504	0.373449	0.0557363	0.0336112	0.154265	0.109778
Cr(g kg-1)	Leaf
Days	2-4mm	2-4mm	2-4mm			1-2mm	1-2mm	1-2mm			0.25-1mm	0.25-1mm	0.25-1mm			<0.25mm	<0.25mm	<0.25mm
28	3.55478	3.57142	3.62363	3.58328	0.0207396	3.82882	3.72908	3.75758	3.77183	0.0296637	3.41325	3.36232	3.45113	3.4089	0.0257265	3.48689	3.43596	3.52476	3.48254	0.0257265
56	5.09197	5.09603	5.18183	5.12328	0.0292983	5.70622	5.53507	5.60978	5.61703	0.0495396	4.77825	4.66432	4.79092	4.7445	0.0402541	4.92825	4.81433	4.94092	4.8945	0.0402541
	Stem
Days	2-4mm	2-4mm	2-4mm			1-2mm	1-2mm	1-2mm			0.25-1mm	0.25-1mm	0.25-1mm			<0.25mm	<0.25mm	<0.25mm
28	3.00802	2.97922	3.23528	3.07418	0.0809779	3.32798	3.12202	3.17527	3.20842	0.0617199	2.6433	2.40787	2.58532	2.5455	0.0708184	2.68012	2.44469	2.87635	2.66705	0.12478
56	4.13362	3.98723	4.49528	4.20538	0.150985	4.71818	4.31903	4.41847	4.48523	0.119961	3.1599	2.64727	2.99692	2.9347	0.151217	3.2349	2.72227	3.59302	3.1834	0.252679
	All
Days	2-4mm	2-4mm	2-4mm			1-2mm	1-2mm	1-2mm			0.25-1mm	0.25-1mm	0.25-1mm			<0.25mm	<0.25mm	<0.25mm
28	3.24698	3.17092	3.40493	3.27428	0.0689153	3.64522	3.37762	3.47678	3.49987	0.0781081	3.258	3.01583	3.24503	3.17295	0.0786517	3.31323	3.07105	3.415	3.26643	0.10201
56	4.49017	4.31752	4.80773	4.53847	0.143554	5.38403	4.83083	5.03497	5.08328	0.161511	4.4424	3.92723	4.39162	4.25375	0.163919	4.5549	4.03973	4.69028	4.4283	0.198179
pH change	Leaf
Days	2-4mm	2-4mm	2-4mm			1-2mm	1-2mm	1-2mm			0.25-1mm	0.25-1mm	0.25-1mm			<0.25mm	<0.25mm	<0.25mm
28	-0.18	-0.18	-0.19	-0.183333	0.00333333	-0.16	-0.15	-0.12	-0.143333	0.0120185	-0.19	-0.24	-0.24	-0.223333	0.0166667	-0.19	-0.23	-0.19	-0.203333	0.0133333
56	-0.18	-0.18	-0.14	-0.166667	0.0133333	-0.2	-0.2	-0.19	-0.196667	0.00333333	-0.35	-0.39	-0.4	-0.38	0.0152753	-0.31	-0.3	-0.26	-0.29	0.0152753
	Stem
Days	2-4mm	2-4mm	2-4mm			1-2mm	1-2mm	1-2mm			0.25-1mm	0.25-1mm	0.25-1mm			<0.25mm	<0.25mm	<0.25mm
28	-0.05	-0.06	-0.05	-0.0533333	0.00333333	-0.04	-0.09	-0.04	-0.0566667	0.0166667	-0.07	-0.06	-0.09	-0.0733333	0.00881917	-0.06	-0.07	-0.02	-0.05	0.0152753
56	-0.07	-0.09	-0.03	-0.0633333	0.0176383	-0.08	-0.14	-0.11	-0.11	0.0173205	-0.2	-0.2	-0.27	-0.223333	0.0233333	-0.16	-0.18	-0.17	-0.17	0.0057735
	All
Days	2-4mm	2-4mm	2-4mm			1-2mm	1-2mm	1-2mm			0.25-1mm	0.25-1mm	0.25-1mm			<0.25mm	<0.25mm	<0.25mm
28	-0.12	-0.09	-0.08	-0.0966667	0.0120185	-0.1	-0.13	-0.08	-0.103333	0.0145297	-0.14	-0.19	-0.19	-0.173333	0.0166667	-0.09	-0.09	-0.1	-0.0933333	0.00333333
56	-0.11	-0.12	-0.11	-0.113333	0.00333333	-0.14	-0.18	-0.15	-0.156667	0.0120185	-0.33	-0.31	-0.3	-0.313333	0.00881917	-0.27	-0.3	-0.24	-0.27	0.0173205
